# Supplementary material
Source: PubMed Central journal article supplement (PMC7906668)
Supplement: mmc1.pdf [file mmc1.pdf]

# THE LANCET

## Rheumatology

### Supplementary appendix

This appendix formed part of the original submission and has been peer reviewed.  
We post it as supplied by the authors.

Supplement to: Cavalli G, Larcher A, Tomelleri A, et al. Interleukin-1 and interleukin-6 inhibition compared with standard management in patients with COVID-19 and hyperinflammation: a cohort study. *Lancet Rheumatol* 2021; published online Feb 4. [https://doi.org/10.1016/S2665-9913\(21\)00012-6](https://doi.org/10.1016/S2665-9913(21)00012-6).

## Supplementary appendix

### Pharmacologic treatment protocol

#### Antiviral therapy

For every patient unless specific contraindications:

- Hydroxychloroquine 200 mg BD orally
- Lopinavir/Ritonavir 400/100 mg BD orally

For selected patients with severe disease (in the ICU):

- Remdesivir 200 mg daily i.v. on day 1, then 100 mg i.v. daily until day 10-14 as compassionate therapy

#### Antibiotic coverage

All patients received an initial empiric antibiotic coverage for community acquired/hospital acquired pneumonia.

For patients admitted from home, without previous antibiotic exposure:

- Ceftriaxone 2 g i.v. daily
- Azithromycin 500 mg i.v. daily until negativization of urine antigen for *L. pneumophila*

For patients with negative cultures and decreasing inflammatory markers ceftriaxone was discontinued after 6 days of therapy.

In case of persistently high/raising inflammatory markers (especially procalcitonin), upgrade therapy to piperacillin/tazobactam + linezolid or meropenem alone was considered. For patients with previous antibiotic coverage or admitted from other healthcare institutions, initial empirical antibiotic coverage was decided on an individual basis depending on previous antibiotic exposure and risk factors for specific pathogens.

## **Baseline features**

### Cardiovascular disease.

Previous diagnosis of ischemic heart disease or congestive heart failure.

### Diabetes.

Previous diagnosis of type 1 or type 2 diabetes mellitus according to International Diagnostic Criteria [1].

### History of neoplasia.

Previous diagnosis of haematological or non-haematological malignancies, except for non-melanoma skin cancer.

- [1] Classification and Diagnosis of Diabetes: Standards of Medical Care in Diabetes-2020,” *Diabetes care*. 2020.

**Supplementary Table 1** - Treatment characteristics (glucocorticoids) of 392 COVID-19 patients with respiratory failure and hyperinflammation.

| <b>Variable</b>                                     | <b>Overall population<br/>(n = 392)</b> | <b>No IL inhibitors<br/>(n = 275; 70%)</b> | <b>IL-1 inhibitors<br/>(n = 62; 16%)</b> | <b>IL-6 inhibitors<br/>(n = 55; 14%)</b> |
|-----------------------------------------------------|-----------------------------------------|--------------------------------------------|------------------------------------------|------------------------------------------|
| <b>Treatment with glucocorticoids</b>               |                                         |                                            |                                          |                                          |
| No                                                  | 325 (83)                                | 221 (80)                                   | 55 (89)                                  | 49 (89)                                  |
| Yes                                                 | 67 (17)                                 | 54 (20)                                    | 7 (11)                                   | 6 (11)                                   |
| <b>*Cumulative mPDN-equivalent dose (mg/kg)</b>     |                                         |                                            |                                          |                                          |
| Median                                              | 440                                     | 459                                        | 160                                      | 427                                      |
| IQR                                                 | 300 - 665                               | 316 - 684                                  | 118 - 410                                | 374 - 530                                |
| <b>*Cumulative mPDN-equivalent dose (mg/Kg/day)</b> |                                         |                                            |                                          |                                          |
| Median                                              | 47                                      | 51                                         | 27                                       | 53                                       |
| IQR                                                 | 30 - 60                                 | 36 - 60                                    | 21 - 35                                  | 32 - 59                                  |
| <b>ICU admission</b>                                |                                         |                                            |                                          |                                          |
| No                                                  | 360 (92)                                | 263 (96)                                   | 49 (79)                                  | 48 (87)                                  |
| Yes                                                 | 32 (8)                                  | 12 (4)                                     | 13 (21)                                  | 7 (13)                                   |

\*Estimated among patients receiving treatment with glucocorticoids.

Data presented as median and interquartile range or frequencies and proportions.

ICU: intensive care unit; IL: interleukin; IQR: interquartile range; mPDN, methylprednisolone

**Supplementary Table 2** - Comparison of baseline descriptive characteristics of patients diagnosed with COVID-19 and hyperinflammation who did not receive IL inhibitors vs. patients treated with IL-1 inhibitors.

| <b>Variable</b>                       | <b>No IL inhibitors<br/>(n = 275)</b> | <b>IL-1 inhibitors<br/>(n = 62)</b> | <b>P value</b> |
|---------------------------------------|---------------------------------------|-------------------------------------|----------------|
| <b>Age (years)</b>                    |                                       |                                     | 0.003          |
| Median                                | 68                                    | 63                                  |                |
| IQR                                   | 58 - 79                               | 52 - 73                             |                |
| <b>Gender</b>                         |                                       |                                     | 0.1            |
| Male                                  | 201 (73)                              | 52 (84)                             |                |
| Female                                | 74 (27)                               | 10 (16)                             |                |
| <b>C-reactive protein (mg/L)</b>      |                                       |                                     | 0.1            |
| Median                                | 127                                   | 143                                 |                |
| IQR                                   | 91 - 169                              | 105 - 172                           |                |
| <b>*Ferritin (ng/mL)</b>              |                                       |                                     | 0.08           |
| Median                                | 1239                                  | 1459                                |                |
| IQR                                   | 841 - 1887                            | 946 - 2761                          |                |
| <b>Lymphocytes (10<sup>9</sup>/L)</b> |                                       |                                     | 0.09           |
| Median                                | 0.9                                   | 0.9                                 |                |
| IQR                                   | 0.6 - 1.1                             | 0.7 - 1.3                           |                |
| <b>Platelets (10<sup>9</sup>/L)</b>   |                                       |                                     | 0.2            |
| Median                                | 228                                   | 238                                 |                |
| IQR                                   | 165 - 297                             | 190 - 296                           |                |
| <b>Creatinine (mg/dL)</b>             |                                       |                                     | 0.2            |
| Median                                | 1.03                                  | 0.96                                |                |
| IQR                                   | 0.85 - 1.36                           | 0.83 - 1.34                         |                |
| <b>Alanine aminotransferase (U/L)</b> |                                       |                                     | 0.1            |
| Median                                | 37                                    | 45                                  |                |
| IQR                                   | 23 - 59                               | 27 - 64                             |                |
| <b>Lactate dehydrogenase (U/L)</b>    |                                       |                                     | 0.04           |
| Median                                | 369                                   | 430                                 |                |
| IQR                                   | 300 - 479                             | 329 - 532                           |                |
| <b>Respiratory support</b>            |                                       |                                     | <0.001         |
| O2                                    | 242 (88)                              | 36 (58)                             |                |
| Non-invasive mechanical ventilation   | 33 (12)                               | 26 (42)                             |                |
| <b>Cardiovascular disease</b>         |                                       |                                     | 0.001          |
| No                                    | 175 (64)                              | 52 (84)                             |                |
| Yes                                   | 100 (36)                              | 10 (16)                             |                |
| <b>History of neoplasia</b>           |                                       |                                     | 0.03           |
| No                                    | 218 (79)                              | 57 (92)                             |                |
| Yes                                   | 57 (21)                               | 5 (8)                               |                |
| <b>Diabetes</b>                       |                                       |                                     | 1              |
| No                                    | 219 (80)                              | 50 (81)                             |                |
| Yes                                   | 56 (20)                               | 12 (19)                             |                |
| <b>Month of admission</b>             |                                       |                                     | 0.06           |
| February                              | 9 (3)                                 | 0 (0)                               |                |
| March                                 | 223 (81)                              | 46 (74)                             |                |
| April                                 | 39 (14)                               | 16 (26)                             |                |
| May                                   | 4 (2)                                 | 0 (0)                               |                |

\*Data missing for 101 patients.

Data presented as median and interquartile range or frequencies and proportions.

IL: interleukin; IQR: interquartile range.

**Supplementary Table 3** - Comparison of baseline descriptive characteristics of patients diagnosed with COVID-19 and hyperinflammatory status who did not receive IL inhibitors vs. patients treated with IL-6 inhibitors.

| Variable                                 | No IL inhibitors<br>(n = 275) | IL-6 inhibitors<br>(n = 55) | P value |
|------------------------------------------|-------------------------------|-----------------------------|---------|
| <b>Age (years)</b>                       |                               |                             | 0.001   |
| Median                                   | 68                            | 58                          |         |
| IQR                                      | 58 - 79                       | 52 - 74                     |         |
| <b>Gender</b>                            |                               |                             | 0.04    |
| Male                                     | 201 (73)                      | 48 (87)                     |         |
| Female                                   | 74 (27)                       | 7 (13)                      |         |
| <b>C-reactive protein (mg/L)</b>         |                               |                             | 0.5     |
| Median                                   | 127                           | 130                         |         |
| IQR                                      | 91 - 169                      | 100 - 195                   |         |
| <b>*Ferritin (ng/mL)</b>                 |                               |                             | 0.01    |
| Median                                   | 1239                          | 1727                        |         |
| IQR                                      | 841 - 1887                    | 1151 - 2757                 |         |
| <b>Lymphocytes (<math>10^9/L</math>)</b> |                               |                             | 0.6     |
| Median                                   | 0.9                           | 0.8                         |         |
| IQR                                      | 0.6 - 1.1                     | 0.6 - 1.1                   |         |
| <b>Platelets (<math>10^9/L</math>)</b>   |                               |                             | 1       |
| Median                                   | 228                           | 219                         |         |
| IQR                                      | 165 - 297                     | 176 - 299                   |         |
| <b>Creatinine (mg/dL)</b>                |                               |                             | 0.3     |
| Median                                   | 1.03                          | 1                           |         |
| IQR                                      | 0.85 - 1.36                   | 0.86 - 1.14                 |         |
| <b>Alanine aminotransferase (U/L)</b>    |                               |                             | 0.06    |
| Median                                   | 37                            | 45                          |         |
| IQR                                      | 23 - 59                       | 30 - 62                     |         |
| <b>Lactate dehydrogenase (U/L)</b>       |                               |                             | 0.001   |
| Median                                   | 369                           | 458                         |         |
| IQR                                      | 300 - 479                     | 414 - 542                   |         |
| <b>Respiratory support</b>               |                               |                             | <0.001  |
| O <sub>2</sub>                           | 242 (88)                      | 29 (53)                     |         |
| Non-invasive mechanical ventilation      | 33 (12)                       | 26 (47)                     |         |
| <b>Cardiovascular disease</b>            |                               |                             | 0.01    |
| No                                       | 175 (64)                      | 46 (84)                     |         |
| Yes                                      | 100 (36)                      | 9 (16)                      |         |
| <b>History of cancer</b>                 |                               |                             | 0.03    |
| No                                       | 218 (79)                      | 51 (92)                     |         |
| Yes                                      | 57 (21)                       | 4 (8)                       |         |
| <b>Diabetes</b>                          |                               |                             | 0.04    |
| No                                       | 219 (80)                      | 51 (93)                     |         |
| Yes                                      | 56 (20)                       | 4 (7)                       |         |
| <b>Month of admission</b>                |                               |                             | 0.02    |
| February                                 | 9 (3)                         | 0 (0)                       |         |
| March                                    | 223 (81)                      | 54 (98)                     |         |
| April                                    | 39 (14)                       | 1 (2)                       |         |
| May                                      | 4 (2)                         | 0 (0)                       |         |

\*Data missing for 107 patients.

Data presented as median and interquartile range or frequencies and proportions.

IL: interleukin; IQR: interquartile range.
